# Supplementary material
Source: publisher figshare collection journal article supplement (https://frontiersin.figshare.com/ndownloader/files/15620651)
Supplement: Supplementary file [file 15620651]

**Transcriptional regulation of the glucose-6-phosphate/Phosphate translocator 2 is related to carbon exchange across the chloroplast envelope**

**Supplementary Tables and Figures**

Sean E. Weise<sup>1,2</sup>, Tiffany Liu<sup>3</sup>, Kevin L. Childs<sup>3</sup>, Alyssa L. Preiser<sup>1</sup>, Hailey M. Katulski<sup>1</sup>, Christopher Perrin-Porzondek<sup>1</sup>, Thomas D. Sharkey<sup>1,2,4\*</sup>

<sup>1</sup>MSU-DOE-Plant Research Laboratory, Michigan State University, East Lansing, MI USA

<sup>2</sup>Department of Biochemistry and Molecular Biology, Michigan State University, East Lansing, MI USA

<sup>3</sup>Department of Plant Biology, Michigan State University, East Lansing, MI USA

<sup>4</sup>Plant Resilience Institute, Michigan State University, East Lansing, MI USA

**Supplementary Table S1.** Primer sequences used in this study

| <b>Gene</b>   | <b>Gene Locus</b> | <b>Standard Generating Primers</b>             | <b>qPCR primers</b>                               |
|---------------|-------------------|------------------------------------------------|---------------------------------------------------|
| <i>ACT2</i>   | At3g18780         | GGTGATGAAGCACAATCCAA<br>CAGTAAGGTCACGTCCAGCA   | CAAAGGCCAACAGAGAGAAGA<br>ATCACCAGAATCCAGCACAA     |
| <i>IDI2</i>   | At3g02780         | CCGAATTTTCGTGCTTTCTC<br>TGCAGCATTCTCACCACCTA   | GTATGAGTTGCTTCTCCAGCAAAG<br>GAGGATGGCTGCAACAAGTGT |
| <i>GPT2</i>   | At1g61800         | CGTGGAAGGTCCTCAAATGT<br>TCACTGCTTCGCCTGTGAGT   | AGACCAGATTTTCGCCGTTAACT<br>ACTGCTTCGCCTGTGAGTAGAG |
| <i>XPT</i>    | At5g17630         | AGGATCACATTGGGTTCAG<br>CTTTGCAGTGGCCTGAGAAT    | CATTGCATCTGTTGGGACAC<br>TGGACTGATCTCGTCGAGTG      |
| <i>G6PDH1</i> | At5g35790         | GAGAATGGCTGGACAAGGGT<br>GCCGGTGTGAATAGATCCCA   | ATTTCGGAACAGAAGGGCGT<br>CAACCACATCTTCAAGCCGC      |
| <i>G6PDH2</i> | At5g13110         | TGGAAGAATCTCAAACCGCCT<br>AGCCTCTCATATGCATCTGGT | ATTTCGGCACTGAAGGACGT<br>GCGTTTCCATGGCAAAGAGG      |
| <i>G6PDH3</i> | At1g24280         | GAGTCTGATGGCGGTGAACA<br>CTGCAAATGTCGGGGTCAGA   | TGCATTGGACGAGAAGCTCA<br>CACATTTACCGCGTCAACA       |
| <i>RRTF1</i>  | At4g34410         | CCCAACCCGGTATCAAAAGGA<br>CTTGGCCCACGGAATCCAAT  | GCCTCGGTTGGATTTCAGACA<br>TGATTTTCCCGCCACCTTCC     |

**Supplementary Table S2.** Specific differentially expressed *Arabidopsis* genes and loci used in heat maps in figure 4 and supplementary figure S5.

| Gene                       | Locus     | Gene                  | Locus     |
|----------------------------|-----------|-----------------------|-----------|
| <b>Calvin-Benson Cycle</b> |           | <b>TP to G6P</b>      |           |
| <i>RBCS1A</i>              | At1g67090 | <i>TPT</i>            | At5g46110 |
| <i>RBCS1B</i>              | At5g38430 | <i>TPI</i>            | At3g55440 |
| <i>RBCS2B</i>              | At5g38420 | <i>FBA5</i>           | At4g26530 |
| <i>RBCS3B</i>              | At5g38410 | <i>FBA6</i>           | At2g36460 |
| <i>RCA</i>                 | At2g39730 | <i>FBA7</i>           | At4g26520 |
| <i>GAPA</i>                | At3g26650 | <i>GPT2</i>           | At1g61800 |
| <i>GAPA2</i>               | At1g12900 | <b>G6P to TP</b>      |           |
| <i>FBA2</i>                | At4g38970 | <i>PFP81</i>          | At4g04040 |
| <i>CFBP2</i>               | At5g64380 | <b>G6P to Sucrose</b> |           |
| <i>SBPASE</i>              | At3g55800 | <i>UGP2</i>           | At5g17310 |
| <i>PRK</i>                 | At1g32060 | <i>SPS3</i>           | At1g04920 |
| <i>CP12-2</i>              | At3g62410 | <i>SPS4</i>           | At4g10120 |
| <b>Starch Synthesis</b>    |           | <i>SPP2</i>           | At2g35840 |
| <i>APL2</i>                | At1g27680 | <i>G6PDH1</i>         | At5g35790 |
| <i>APL3</i>                | At4g39210 | <i>G6PDH2</i>         | At5g13110 |
| <i>APL4</i>                | At2g21590 | <i>G6PDH3</i>         | At1g24280 |
| <i>SS2</i>                 | At3g01180 | <i>GAPN</i>           | At2g24270 |
| <i>SS3</i>                 | At1g11720 |                       |           |
| <i>SS4</i>                 | At4g18240 |                       |           |
| <i>GBSS1</i>               | At1g32900 |                       |           |
| <i>SBE1</i>                | At3g20440 |                       |           |
| <i>SBE3</i>                | At2g36390 |                       |           |
| <i>PHS1</i>                | At3g29320 |                       |           |
| <i>GWD</i>                 | At1g10760 |                       |           |
| <i>PWD</i>                 | At5g26570 |                       |           |

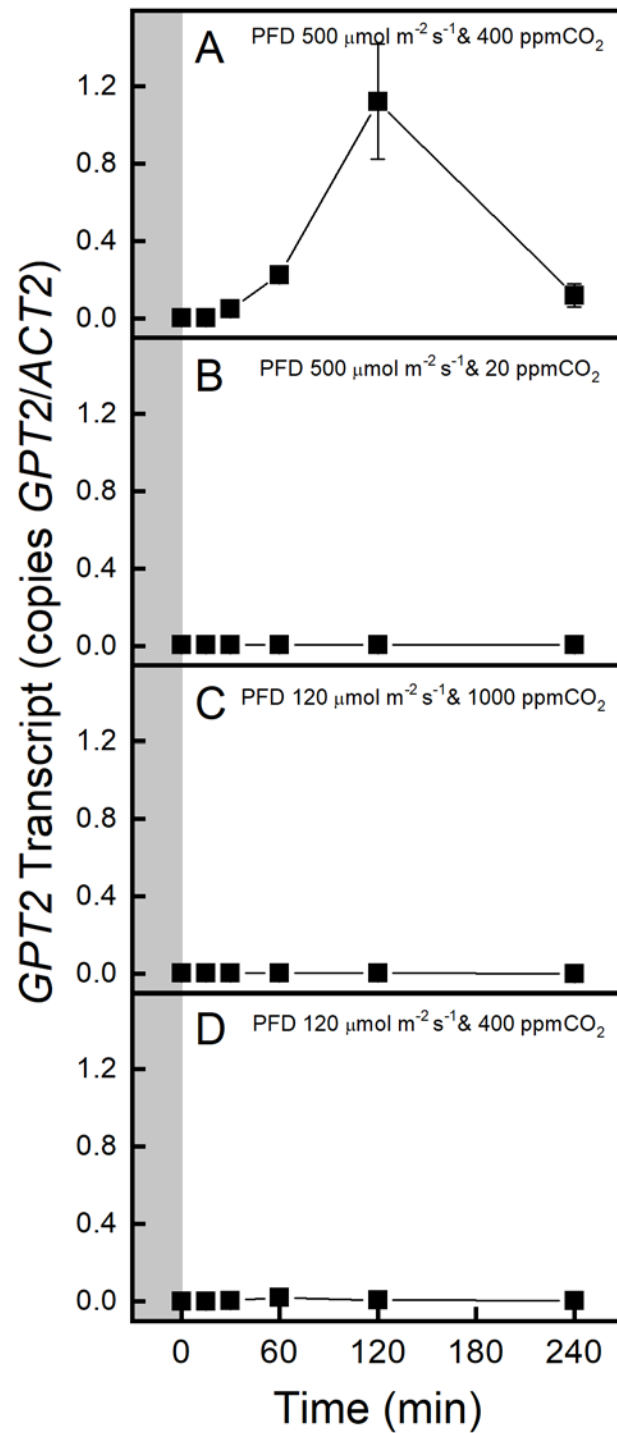

**Supplementary Figure S1.** Expression of *GPT2* in WS before and after transfer to an altered light or  $\text{CO}_2$  environment. The grey block indicates sampling in growth conditions, PFD 120  $\mu\text{mol m}^{-2} \text{s}^{-1}$  and 400 ppm  $\text{CO}_2$ .  $n = 5$

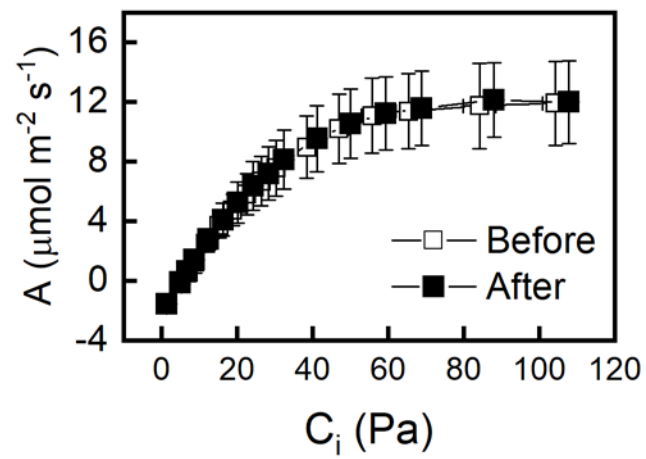

**Supplementary Figure S2.** A –  $C_i$  curves of WS taken before and after 4 hr incubation at a PFD of  $500 \mu\text{mol m}^{-2} \text{s}^{-1}$  and  $C_a$  of 400 ppm. A –  $C_i$  curves were done at a PFD of  $500 \mu\text{mol m}^{-2} \text{s}^{-1}$  n=5

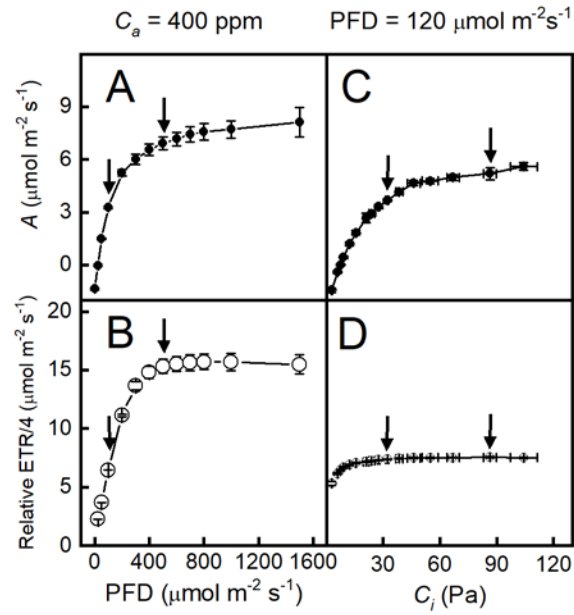

**Supplementary Figure S3.** Photosynthetic and relative electron transport (ETR) rates in Col-0 in varying light and  $\text{CO}_2$  environments. Arrows indicate the PFD or average  $C_i$  values that correspond to the PFD or  $C_a$  values used in transcript experiments. ETR/4 is taken as the relative approximate rate of the Calvin-Benson cycle turnover.  $n=5$

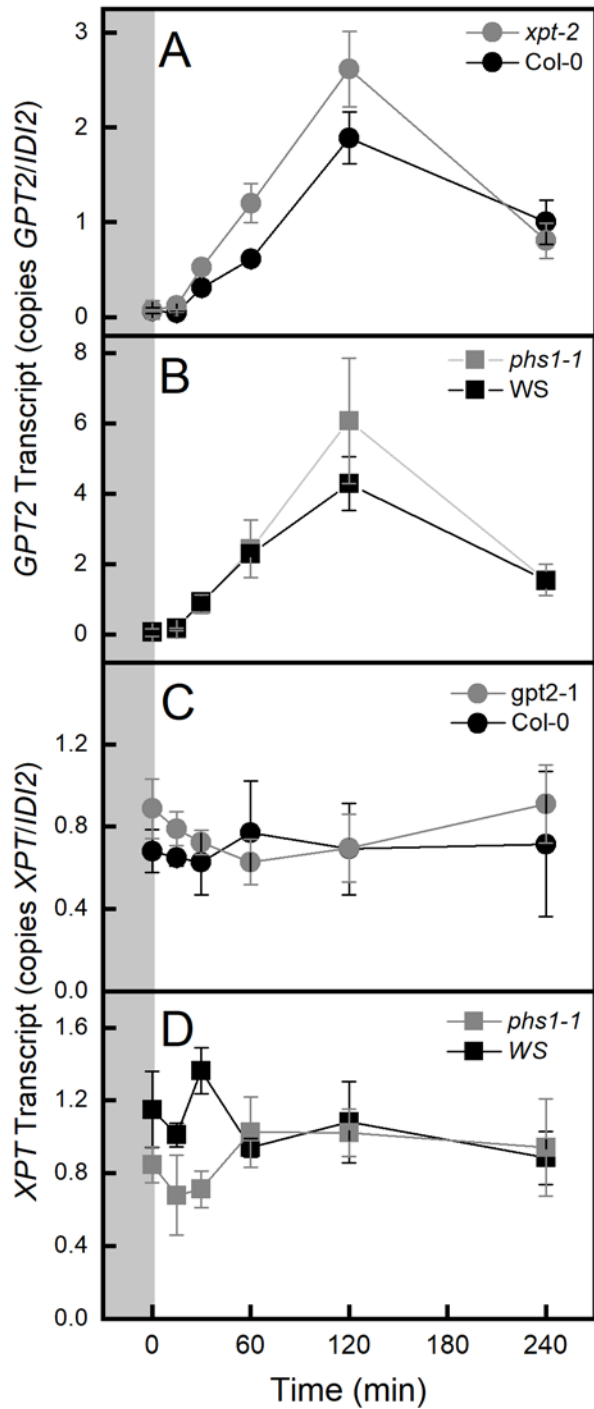

**Supplementary Figure S4.** Expression of *GPT2* and *XPT* in *xpt-2*, *gpt2-1*, and *phs1-1* mutants in response to a PFD of 500  $\mu\text{mol m}^{-2} \text{s}^{-1}$   $\text{C}_a$  of 400 ppm. The grey block indicates sampling in growth conditions, PFD 120  $\mu\text{mol m}^{-2} \text{s}^{-1}$  and 400 ppm  $\text{CO}_2$ . n = 5

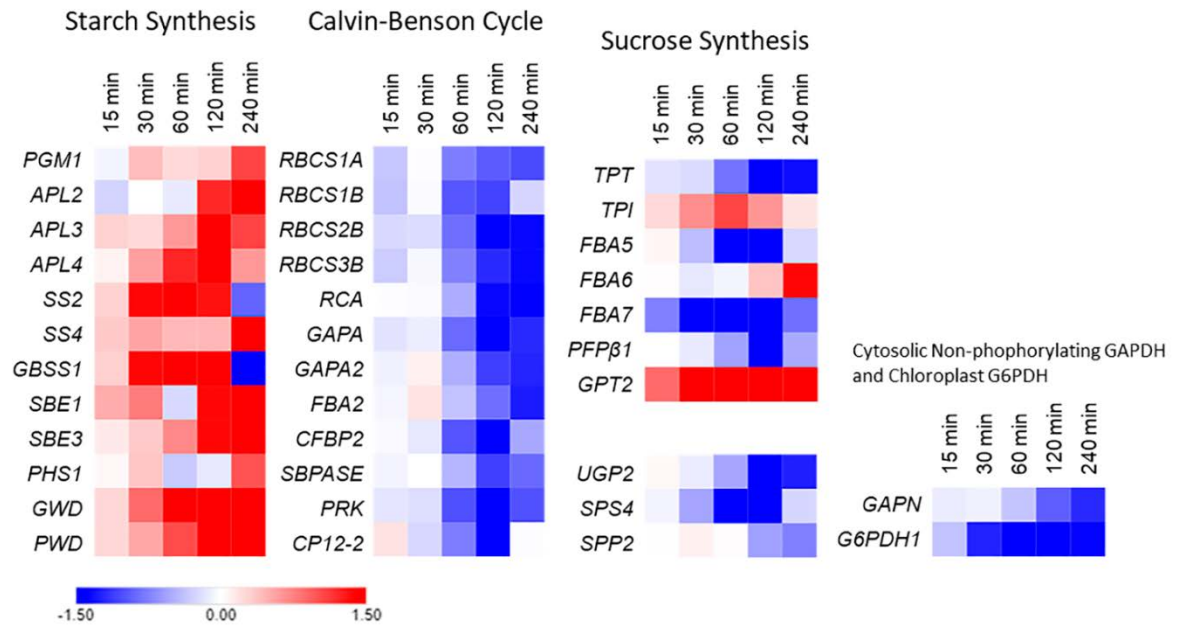

**Supplementary Figure S5.** Changes in transcription in WS in response to an increase in PFD from 120 to 500  $\mu\text{mol m}^{-2} \text{s}^{-1}$ . Red boxes represent an increase in transcription and blue a decrease. Expression values shown had a  $\log_2$  RPKM fold change greater than 1 and are on an absolute scale of -1.5 to 1.5  $n=3$



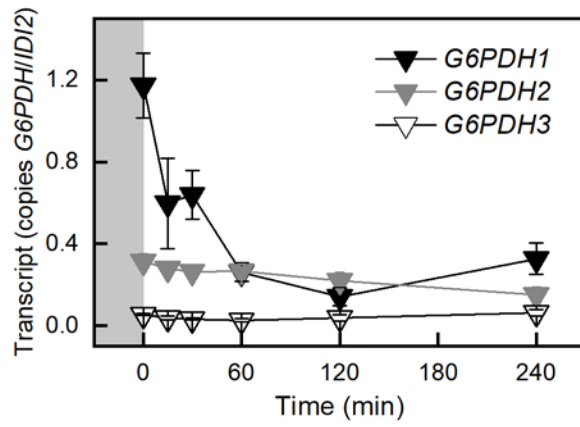

**Supplementary Figure S6.** Changes in transcription of the plastid *G6PDHs* in WS in response to a PFD of  $500 \mu\text{mol m}^{-2} \text{s}^{-1}$   $C_a$  400 ppm. Grey block indicates sampling in growth conditions, PFD  $120 \mu\text{mol m}^{-2} \text{s}^{-1}$  and 400 ppm  $\text{CO}_2$ .  $n=5$

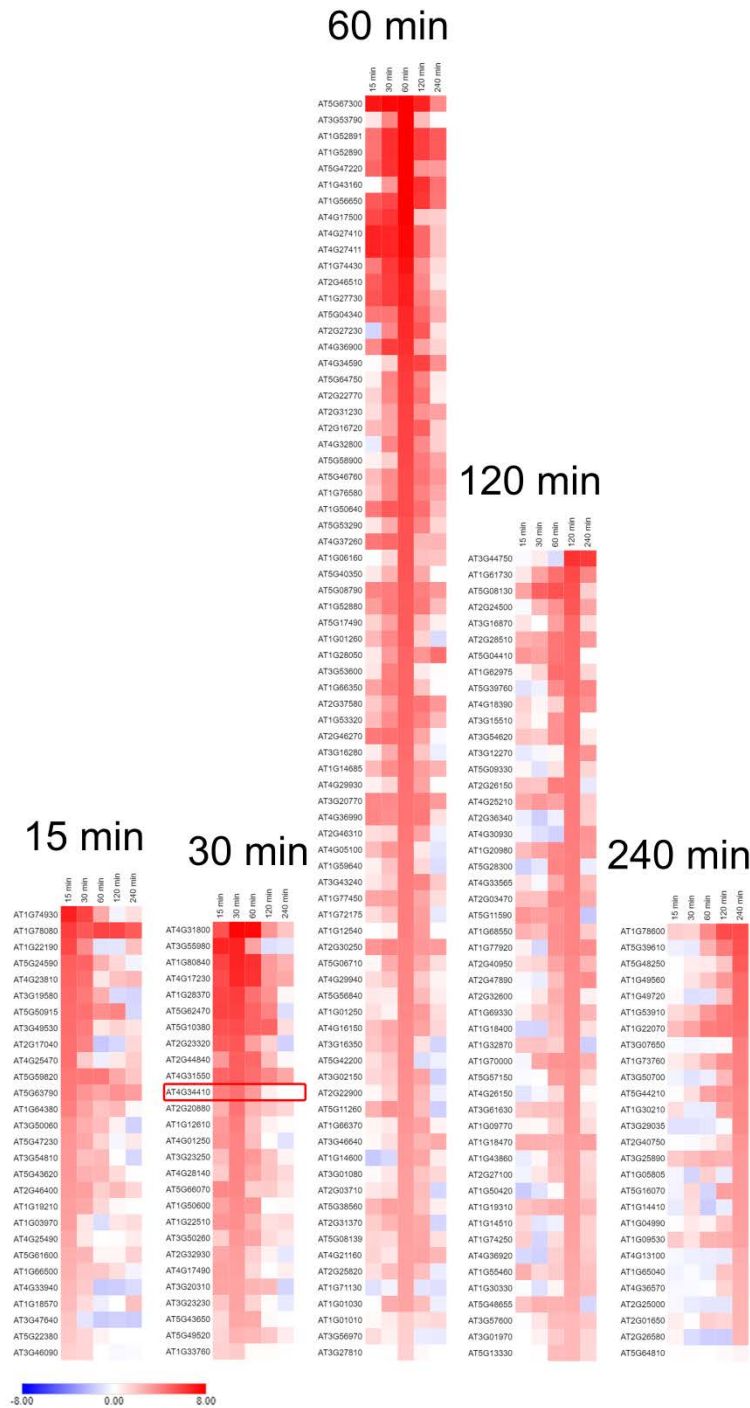

**Supplementary Figure S7.** Transcription factors in WS whose expression was increased in response to an increase in PFD from 120 to 500  $\mu\text{mol m}^{-2} \text{s}^{-1}$ . Transcription factors are grouped according to the time they had the highest transcript abundance after transfer to high light. The red box is around the *RRTF1* transcription factor. Expression values used for heat map generation are the  $\log_2 \Delta\text{RPKM} + 1$  and are on an absolute scale of -8 to 8.  $n=3$

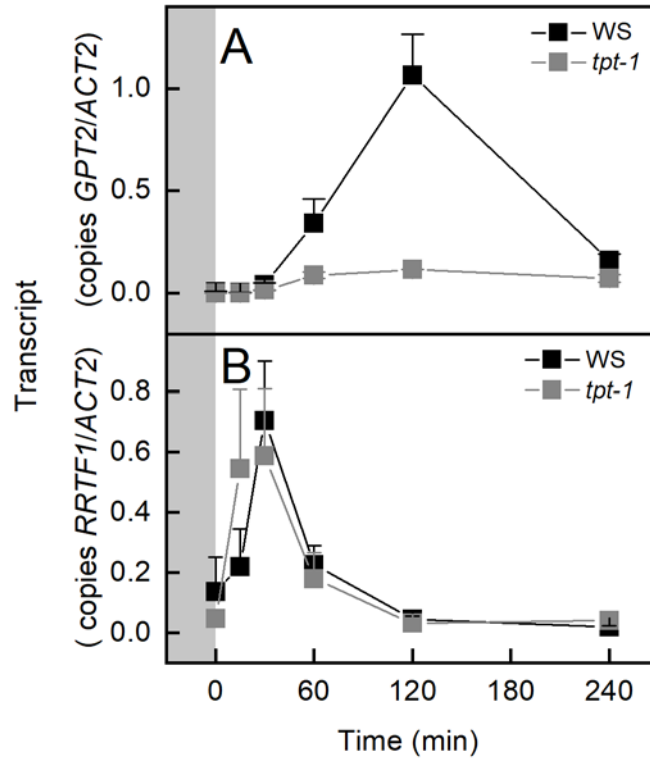

**Supplementary Figure S8.** Expression of *GPT2* and *RRTF1* in response to an increase in PFD from 120 to 500  $\mu\text{mol m}^{-2} \text{s}^{-1}$   $C_a$  400 ppm in WS and the *tpt-1* mutant. Grey block indicates sampling in growth conditions, PFD 120  $\mu\text{mol m}^{-2} \text{s}^{-1}$  and 400 ppm  $\text{CO}_2$ .  $n=5$
